# Supplementary material for: Highly active and durable platinum-lead bimetallic alloy nanoflowers for formic acid electrooxidation
Source: Royal Society of Chemistry journal article supplement (doi:10.1039/c4nr07375d), 2015-01-01
Supplement: c4nr07375d1.pdf [file c4nr07375d1.pdf]

Supporting Information

**Highly active and durable platinum-lead bimetallic alloy nanoflowers for formic acid electrooxidation**

Mingxing Gong,<sup>b§</sup> Fumin Li,<sup>a§</sup> Zhigang Yao,<sup>b</sup> Suqi Zhang,<sup>b</sup> Jingwen Dong,<sup>b</sup> Yu

Chen,<sup>\*a</sup> and Yawen Tang<sup>b</sup>

<sup>a</sup> School of Materials Science and Engineering, Shaanxi Normal University, Xi'an 710062, PR China

<sup>b</sup> Jiangsu Key Laboratory of New Power Batteries, Jiangsu Collaborative Innovation Center of Biomedical Functional Materials, College of Chemistry and Materials Science, Nanjing Normal University, Nanjing 210023, PR China.

‡ These two authors made an equal contribution to this work.

\* Corresponding author: Tel: +86 29 815 307 09; fax: +86 29 815 307 02.

*E-mail address:* ndchenyu@gmail.com (Y. Chen).

## Experimental section

### Reagents and Chemicals

Potassium tetrachloroplatinate(II) ( $K_2PtCl_4$ ), lead nitrate ( $Pb(NO_3)_2$ ), formic acid ( $HCOOH$ ), sulfuric acid ( $H_2SO_4$ ) and formaldehyde ( $HCHO$ ) solution (40%) were purchased from Sinopharm Chemical Reagent Co., Ltd. Polyallylamine hydrochloride (PAH, Scheme S1,  $M_w=15\ 0000$ ) was supplied from Nitto Boseki Co., Ltd. Commercial Pt black was purchased from Johnson Matthey Corporation. All the aqueous solutions were prepared with deionized water.

### Preparation of $Pt_{84}Pb_{16}$ BANFs

In a typical procedure, 2 mL of 0.5 M PAH, 1.7 mL of 0.05 M  $K_2PtCl_4$ , and 3.4 mL of 0.05 M  $Pb(NO_3)_2$  aqueous solutions were added into the 3 mL  $H_2O$ . After adjusting solution pH to 4.0, 2.0 mL of  $HCHO$  solution (40%) was added into the mixture solution. Then, the mixture solution was heated at 120 °C for 6 h. After being cooled to room temperature, the obtained  $Pt_{84}Pb_{16}$ BANFs were separated by centrifugation, washed with water acetic acid for 12 h, and dried at 60 °C for 5 h in a vacuum dryer.

### Apparatus

X-ray diffraction (XRD) patterns of samples were obtained from Model D/max-rC X-ray diffractometer (Cu Ka radiation source,  $\lambda=1.5406\ \text{Å}$ , operating at 40 kV and 100 mA). The X-ray (EDX) analysis of samples were carried on a JEOL JSM-7600F SEM instrument. X-ray photoelectron spectroscopy (XPS) measurements were performed on a Thermo VG Scientific ESCALAB 250 spectrometer. The binding energy was calibrated by means of the C 1s peak energy of 284.6 eV. Transmission electron microscopy (TEM), high-resolution TEM (HRTEM), selected area diffraction (SAED), high-angle annular dark-field scanning TEM and EDX mapping images were performed on a JEOL JEM-2100 instrument operated at 200 kV.

## Electrochemical measurements

Cyclic voltammetry and chronoamperometry experiments were performed on a CHI 660D electrochemical work station (CH Instruments, Shanghai, Chenghua Co.) at  $30 \pm 1$  °C using conventional three-electrode system. A saturated calomel electrode as the reference electrode, a pure platinum wire as the counter electrode, and the sample modified glassy carbon (3 mm diameter) electrode as the working electrode.

For the preparation of the working electrodes, 5.0 mg of catalyst was dispersed into 5.0 mL of water to form a homogeneous suspension by ultrasonication for 1 h. Then 4  $\mu$ L dispersion was covered onto the surface of the glassy carbon electrode. After the drying naturally, 2.0  $\mu$ L of 5.0 wt% Nafion solution was spread on the surface of the catalyst layer. The Pt metal loading on the electrode surface was about 3.2  $\mu$ g. The electrochemically active surface areas (ECSA) of Pt electrocatalysts were calculated from the following equation by measuring the charge collected in the hydrogen adsorption/desorption region after double-layer correction and assuming a value of 210  $\mu$ C  $\text{cm}^{-2}$  for the adsorption of a hydrogen monolayer.<sup>1,2</sup>

$$ECSA = \frac{Q}{m \times C} \quad (1)$$

Where  $Q$  was the charge collected in the hydrogen adsorption/desorption region after double-layer correction,  $m$  was the loading amount of Pt metal,  $C$  was the charge required for monolayer adsorption of hydrogen on a Pt surface.

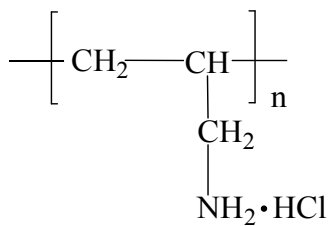

**Scheme S1.** The molecular structure of PAH.

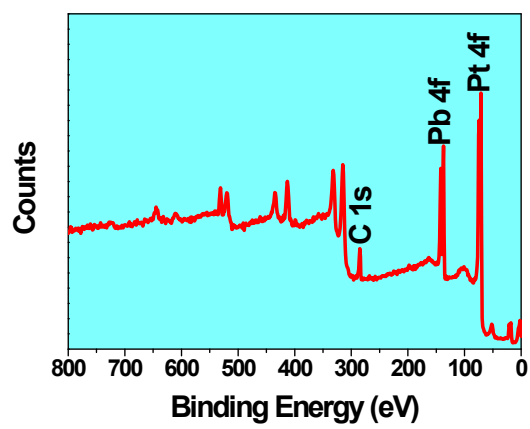

**Fig. S1.** XPS spectrum of Pt<sub>84</sub>Pb<sub>16</sub> BANFs.

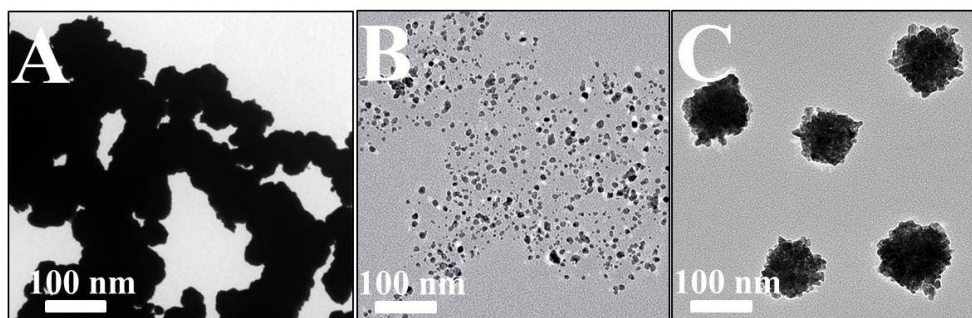

**Fig. S2.** TEM images of the synthesized products with (A) 0.0 mL, (B) 0.2 mL, and (C) 4.0 mL of 0.5 M PAH.

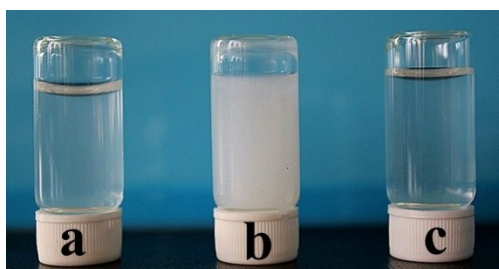

**Fig. S3.** Photographs of (a) single-component  $\text{Pb}(\text{NO}_3)_2$  solution at pH 4.0 and (b) white precipitate obtained by adjusting pH value of single-component  $\text{Pb}(\text{NO}_3)_2$  solution to 6.0. (c) Photographs of PAH/ $\text{Pb}(\text{NO}_3)_2$  mixture solution at pH 6.0.

After adjusting pH value of single-component  $\text{Pb}(\text{NO}_3)_2$  solution (Fig. S3a) to 6.0, a lot of white precipitates generate immediately (Fig. S3b). In contrast, no precipitate is observed after adjusting pH value of PAH/ $\text{Pb}(\text{NO}_3)_2$  mixture solution to 6.0 (Fig. S3c). These above experimental phenomena confirm that PAH can interact with  $\text{Pb}(\text{NO}_3)_2$  to generate colorless PAH- $\text{Pb}^{\text{II}}$  complex via coordination interaction.

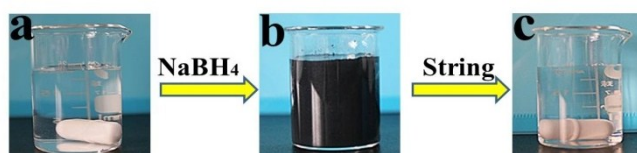

**Fig. S4.** (a) Photograph of PAH/ $\text{Pb}(\text{NO}_3)_2$  mixture solution at pH=4.0. (b) Photograph of the black Pb nanocrystals prepared by  $\text{NaBH}_4$  reduction. (c) Photograph of black Pb nanocrystals solution after the continuous string for 2 h in air.

**Table S1.** The preparation condition, chemical composition, and morphology of various PtPb alloy nanocrystals in Fig. 4

| Sample                                                    | Pt <sup>II</sup> /Pb <sup>II</sup> feeding ratio | Pt/Pb atomic ratio measured by EDX | Pt/Pb atomic ratio measured by XPS | Morphology                                                                            |
|-----------------------------------------------------------|--------------------------------------------------|------------------------------------|------------------------------------|---------------------------------------------------------------------------------------|
| PtPb-1                                                    | 4:1                                              | 88.2:11.8                          | 82:18                              | 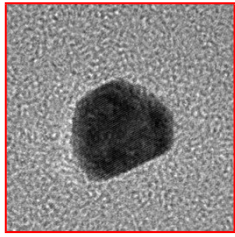   |
| PtPb-2                                                    | 2:1                                              | 87.6:12.4                          | 79:21                              |    |
| PtPb-3                                                    | 1:1                                              | 86.6:13.4                          | 75:25                              |   |
| PtPb-4<br>(i.e., Pt <sub>84</sub> Pb <sub>16</sub> BANFs) | 1:2                                              | 83.8:16.2                          | 73:27                              |  |
| PtPb-5                                                    | 1:4                                              | 83.1:16.9                          | 70:30                              |  |

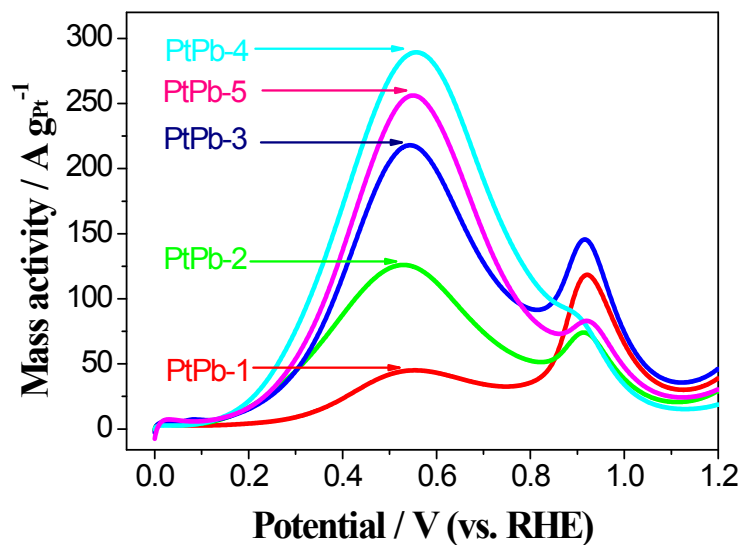

**Fig. S5.** Pt mass-normalized cyclic voltammograms of various PtPb alloy nanocrystals in Tables S1 in the N<sub>2</sub>-saturated 0.5 M HCOOH + 0.5 M H<sub>2</sub>SO<sub>4</sub> solution at the scan rate of 50 mV s<sup>-1</sup>.

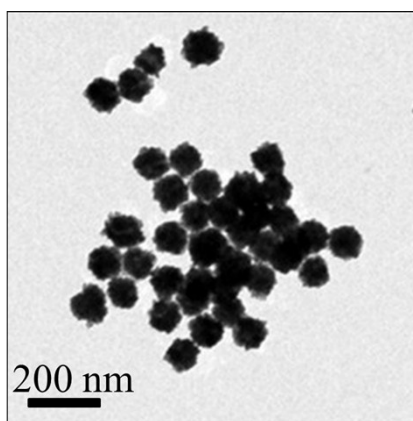

**Fig. S6.** TEM image of Pt<sub>84</sub>Pb<sub>16</sub> BANFs after chronoamperometry run.

1. B. Lim, M. Jiang, P. H. C. Camargo, E. C. Cho, J. Tao, X. Lu, Y. Zhu and Y. Xia, *Science*, 2009, **324**, 1302-1305.
2. R. Kou, Y. Shao, D. Mei, Z. Nie, D. Wang, C. Wang, V. V. Viswanathan, S. Park, I. A. Aksay and Y. Lin, *J Am Chem Soc*, 2011, **138**, 2541-2547.
